# Supplementary material for: IL-6–GP130 signaling protects human hepatocytes against lipid droplet accumulation in humanized liver models
Source: PubMed Central journal article supplement — Sci Adv. 2023 Apr 14;9(15):eadf4490. doi: 10.1126/sciadv.adf4490 (PMC10104468; doi:10.1126/sciadv.adf4490), 2023-04-14
Supplement: sciadv.adf4490_sm.pdf [file sciadv.adf4490_sm.pdf]

Supplementary Materials for  
**IL-6–GP130 signaling protects human hepatocytes against lipid droplet  
accumulation in humanized liver models**

Marisa Carbonaro *et al.*

Corresponding author: Zhe Li, zhe.li@regeneron.com

*Sci. Adv.* **9**, eadf4490 (2023)  
DOI: 10.1126/sciadv.adf4490

**This PDF file includes:**

Figs. S1 to S8  
Table S1

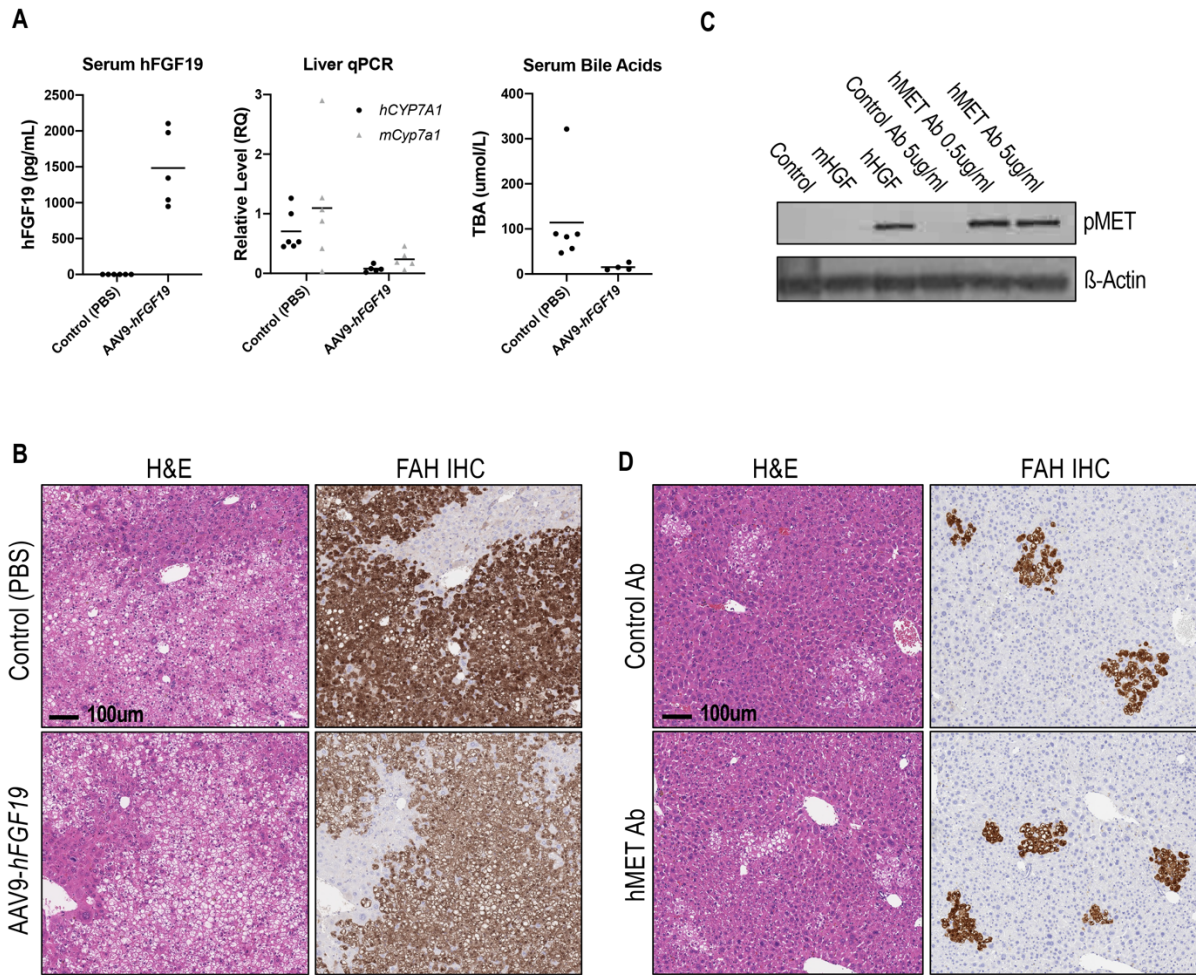

**Figure S1. Restoration of FGF19-FGFR4 or HGF-MET signaling pathways do not correct lipid accumulation in human hepatocytes.** **A.** AAV9-*hFGF19* treatment resulted in expression of hFGF19 protein, inhibition of the FGF19-FGFR4 target gene, *Cyp7a1*, expression in the liver and reduced bile acid production, as demonstrated by levels of hFGF19 in the serum (left panel), human *CYP7A1* and mouse *Cyp7a1* expression in the liver (middle panel; levels normalized to human and mouse *GAPDH*, respectively) and total bile acid (TBA) levels (right panel) in mice treated with AAV9-*hFGF19* vs. PBS control at the time of hepatocyte transplant. Lines in each graph represent the mean value. **B.** AAV9-*hFGF19* treatment did not correct hepatosteatosis in humanized liver mice, as shown by H&E and FAH IHC in livers from control vs. AAV9-*hFGF19* treated mice. **C.** Human cMET activating antibody mimics hHGF to activate MET, as shown by pMET levels in mouse hepatocytes with the endogenous murine *cMet* replaced by the human *cMET* gene, treated with mouse or human HGF (50ng/ml), control antibody, or a human-specific cMET activating antibody for 15 minutes. **D.** Human cMET activating antibody treatment (25mg/kg, 1x/week) did not correct hepatosteatosis in humanized liver mice, as shown by H&E and FAH IHC.

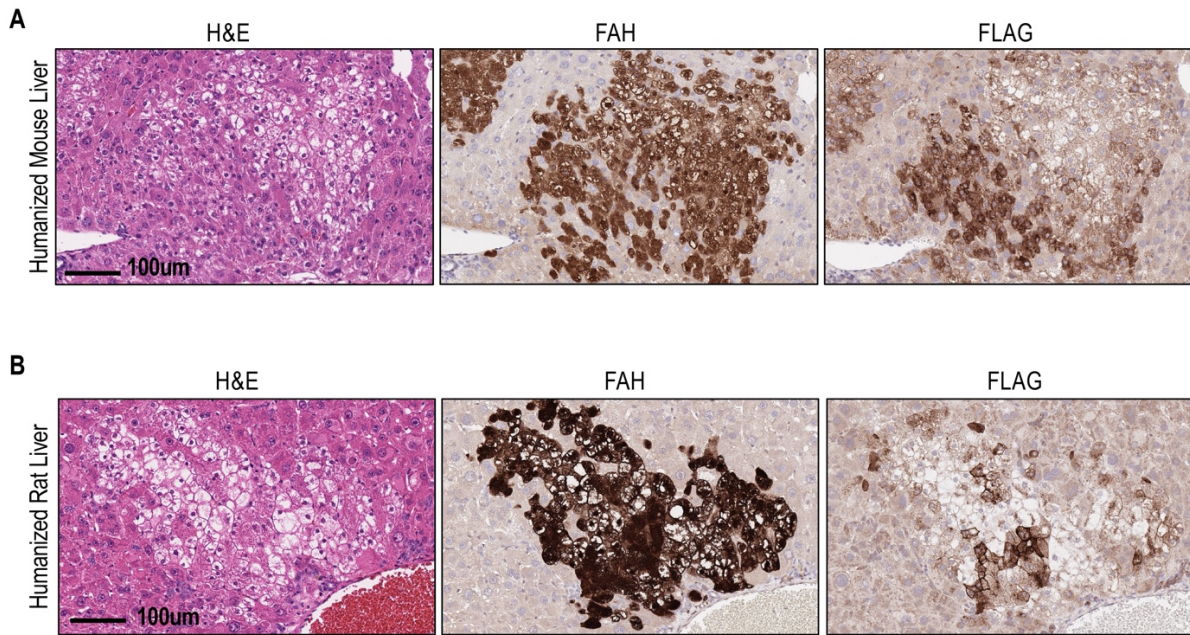

**Figure S2. Expression of rodent IL6R in human hepatocytes eliminates lipid droplet accumulation in humanized livers. A & B.** Ectopic expression of mouse (A) or rat (B) IL6R in human hepatocytes eliminates lipid droplet accumulation, as shown by H&E (left), FAH IHC (middle) and FLAG IHC (right) staining of nearby sections of *FSRG* mouse livers (A) or *FRG* rat livers (B) engrafted with PHH infected with lentivirus carrying *mIl6r* or *rIl6r*, respectively. mIL6R- or rIL6R-expressing human hepatocytes are positive for both FAH and FLAG IHC, while non-transduced human hepatocytes are FAH positive, but FLAG negative. Non-engrafted regions (endogenous mouse or rat cells) are negative for both FAH and FLAG IHC.

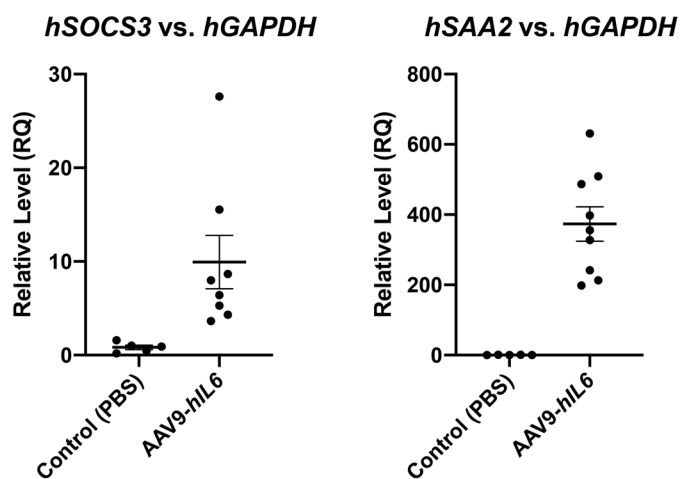

**Figure S3. hIL6 over-expression by AAV can signal to engrafted human hepatocytes in humanized liver mouse model.** AAV9-*hIL6* treatment led to activation of IL6 target genes in humanized livers, as shown by RNA levels of human *SOCS3* (left) and *SAA2* (right), in the livers of AAV9-*hIL6* treated mice, measured by TaqMan qPCR (plotted as mean  $\pm$  SD).

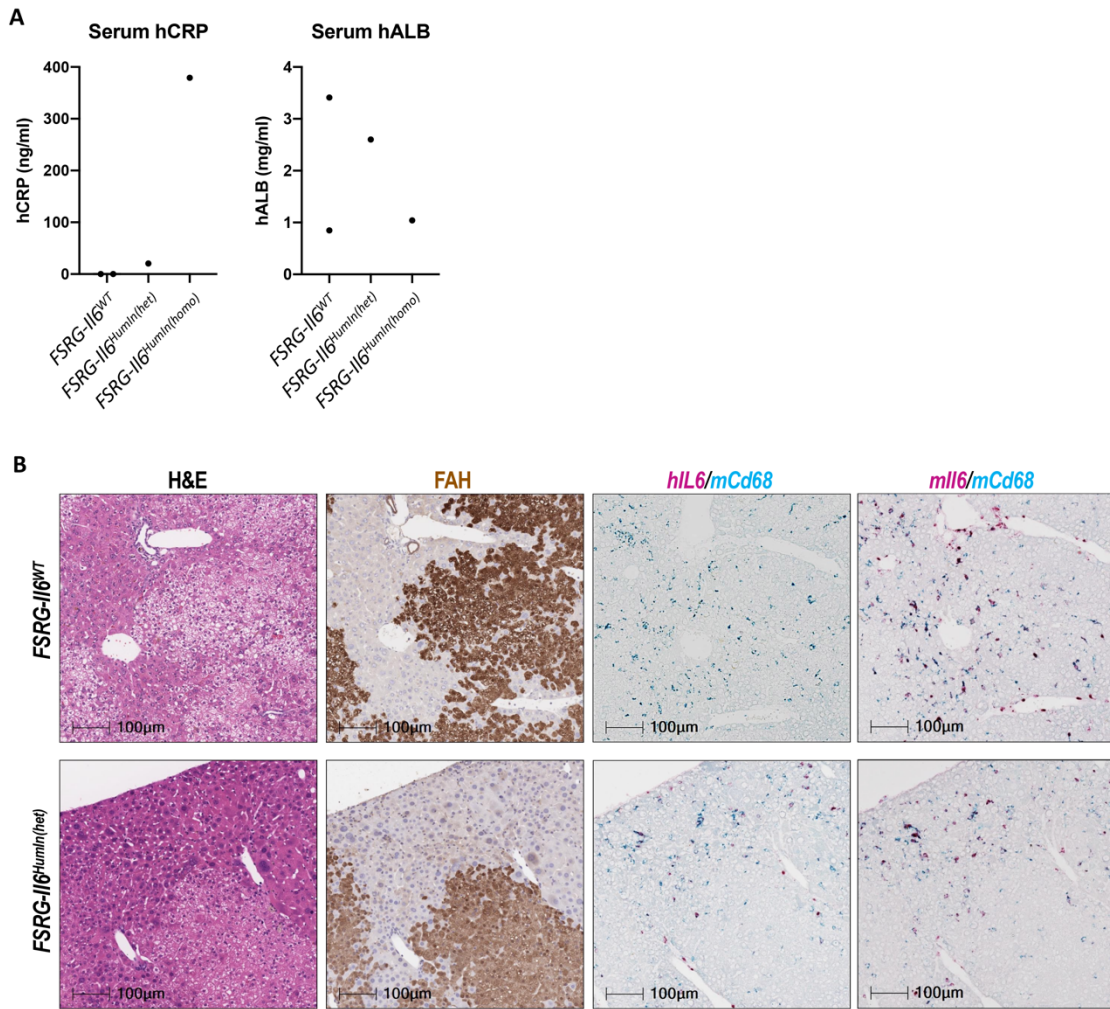

**Figure S4. IL6 expression and signaling in the livers of *FSRG-hIL6* mice. A.** Humanization of *Il6* allele led to a human specific hepatic IL6 response, shown by hCRP expression in *FSRG- Il6*<sup>HumIn(het)</sup> and *FSRG-Il6*<sup>HumIn(homo)</sup>, but not *FSRG-Il6*<sup>WT</sup> humanized liver mice (left). Engraftment of human hepatocytes was confirmed by serum hALB (right). **B.** Human *IL6* was detected (predominately in *Cd68* positive cells) in the livers of *FSRG-Il6*<sup>HumIn(het)</sup>, but not *FSRG-Il6*<sup>WT</sup> humanized liver mice after 2hr LPS stimulation, as shown by H&E, FAH IHC, *hIL6* (pink), *mIl6* (pink) and *mCd68* (blue) RNAscope staining.

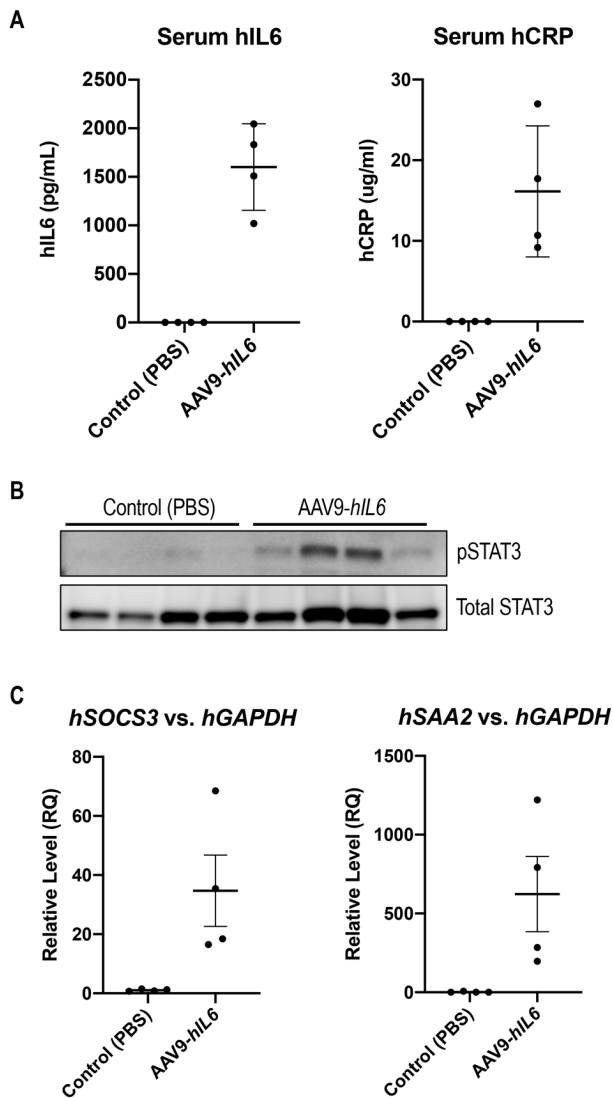

**Figure S5. AAV9-*hIL6* dosing activates IL6 signaling in humanized liver mice.** Humanized liver mice were treated with AAV9-*hIL6* or PBS control 8 weeks after PHH transplantation, and collected 4 weeks after AAV dosing. **A.** AAV9-*hIL6* dosing resulted in expression of hIL6 (left) and prototype acute phase reactant hCRP (right) in the serum of humanized liver mice. **B & C.** AAV9-*hIL6* dosing resulted in activation of hepatic IL6 pathway, as shown by a pSTAT3 Western blot of protein extracts (**B**), and RNA expression of IL6 target genes, *SOCS3* and *SAA2* (**C**) in humanized mouse livers treated with AAV9-*hIL6* vs. control PBS. Data plotted as mean  $\pm$  SD.

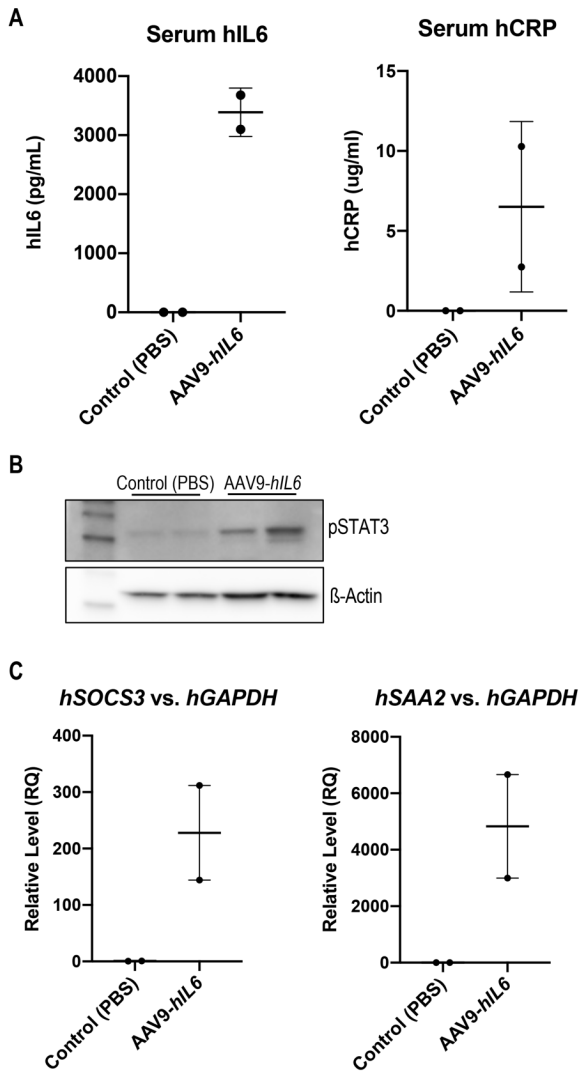

**Figure S6. AAV9-*hIL6* treatment in humanized liver rats.** Humanized liver rats were treated with AAV9-*hIL6* or PBS 12 weeks after PHH transplant, and collected 4 weeks after AAV dosing. **A.** AAV9-*hIL6* dosing resulted in expression of hIL6 (left) and prototype acute phase reactant hCRP (right) in the serum of humanized liver rats. **B & C.** AAV9-*hIL6* dosing resulted in activation of hepatic IL6 pathway, as shown by a pSTAT3 Western blot of protein extracts (**B**) and RNA expression of IL6 target genes, *SOCS3* and *SAA2* (**C**), in humanized rat livers treated with AAV9-*hIL6* vs. control PBS. Data plotted as mean  $\pm$  SD.

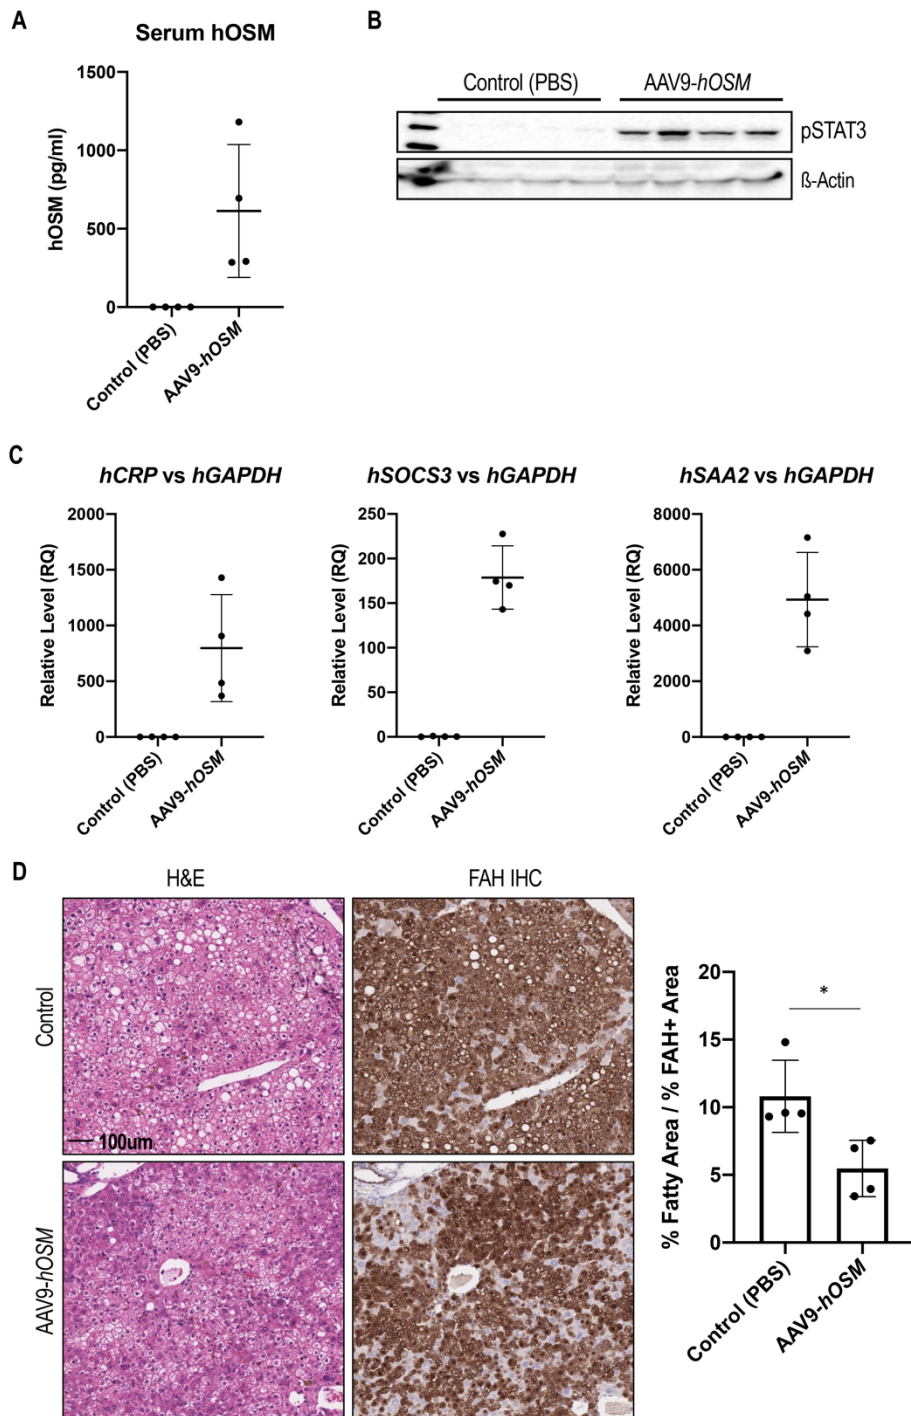

**Figure S7. Human OSM over-expression also corrects lipid droplet accumulation in engrafted human hepatocytes.** Humanized liver mice were treated with AAV9-*hOSM* or PBS control 12 weeks after PHH transplantation, and collected 3 weeks after AAV dosing. **A.** hOSM levels in the serum of humanized liver mice at the time of termination. **B.** Western blot of liver lysates confirming activation of pSTAT3 in AAV9-*hOSM* treated mice. **C.** RNA expression of human target genes, *CRP*, *SOCS3* and *SAA2* in AAV9-*hOSM* treated versus control mice, confirming activation of downstream gp130 signaling. **D.** H&E staining and FAH IHC on liver sections from AAV9-*hOSM* and PBS treated mice. Quantification of the % fatty area (negative H&E staining) over % positive FAH staining shows mean  $\pm$  SD (each dot represents one mouse, 2 liver lobes/mouse were analyzed). \*  $p < 0.05$ , Unpaired *t* test.



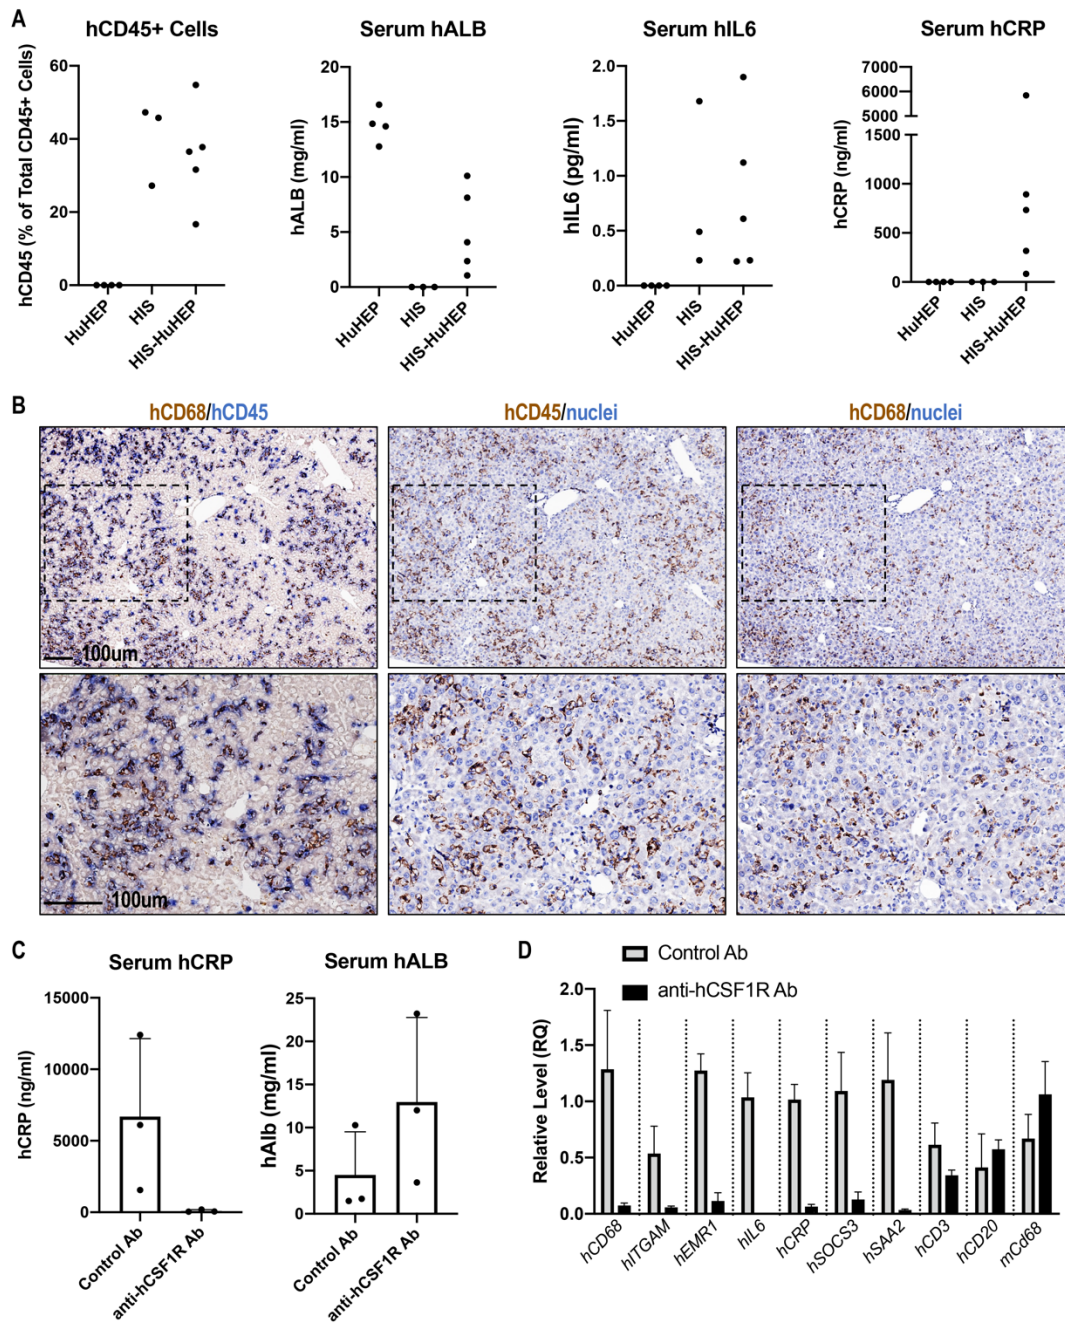

**Figure S8. Engraftment of human immune cells led to hIL6 expression in HIS-HuHEP mice. A.** Human immune cell engraftment shown by hCD45+ cells in the peripheral blood of HIS and HIS-HuHEP, but not HuHEP mice (left panel). Human hepatocyte engraftment was shown by serum human albumin in HuHEP and HIS-HuHEP, but not HIS mice (second panel). hIL6 expression was detected in the serum of HIS and HIS-HuHEP, but not HuHEP mice (third panel). Hepatic IL6 target gene, hCRP, was detected only in the serum of HIS-HuHEP mice, with both human immune cells and human hepatocytes (right panel). **B.** Single and double-IHC for hCD45 and hCD68 in nearby sections from HIS-HuHEP mouse livers. Double staining (left panels) confirms that the majority of hCD45+ cells (blue) are also hCD68+ (brown). **C.** Anti-hCSF1R treatment led to complete absence of hCRP in HIS-HuHEP mice, as shown by hCRP ELISA (left), despite high liver humanization as indicated by human albumin levels (right). **D.** Anti-hCSF1R treatment led to depletion of human macrophages, but not other immune cells, as shown by RNA expression of human macrophage markers (*hCD68*, *hITGAM*, *hEMR1*), *hIL6*, *hCD3*, *hCD20* and mouse *Cd68* in livers of control or anti-hCSF1R antibody treated HIS-HuHEP mice. Data in C & D shown as mean  $\pm$  SD.

| Gene           | Probe Sequence             | Forward Primer            | Reverse Primer            |
|----------------|----------------------------|---------------------------|---------------------------|
| <i>hIL6</i>    | CGGCATCTCAGCCCTGAGAAAGGA   | TGACAAACAAATTCGGTACATCCTC | GTGCCTCTTTGCTGCTTTCAC     |
| <i>hSOCS3</i>  | TCCAAGAGCGAGTACCAGCTGG     | TGCGCCTCAAGACCTTCAG       | TCACTGCGCTCCAGTAGAAG      |
| <i>hSAA2</i>   | AATATCCAGAGACTCACAGGCCGTGG | GGCTGCAGAAGTGATCAGCAATG   | ATCGGCCAGCGAGTCCTC        |
| <i>hCRP</i>    | TGTCTGGTCTGGGAGCTCGTTAAC   | AGCGCCTGAGAAATGGAGGTAA    | TGGACCGTTTCCCAGCATA       |
| <i>hCD68</i>   | AACAGCACTGCCACCAGCCCAG     | GCCACGGTTCATCCAACAAG      | GGTGGGCAGAACTGGTGAATC     |
| <i>hITGAM</i>  | CCTCTCACTCCGACTTTCTGGCTGA  | TGCCACACCAAGGAGCG         | GTTGCCTTTGAGGGTAGCATTG    |
| <i>hEMR1</i>   | CCACACGAAACCAACACAAAGGG    | AGCTGGGAAGGGCACATAAGAC    | GCTGGGCACAAGGTA CTG       |
| <i>hCD3</i>    | TCCAGAGACAACGCCAAGGATTCC   | GAAGGGCCGATTACCATC        | TGCAGCTCTCAGACTGTCCAT     |
| <i>hCD20</i>   | TGCTATGCAATCTGGTCCAAAACCAC | CCGGCAGAGCCAATGAAAGG      | GGCCCACCAGTGAAGACATC      |
| <i>mCd68</i>   | CTTCCCACAGGCAGCACAGTGG     | GGCGGTGGAATACAATGTGTC     | GGAGCTCTCGAAGAGATGAATTCTG |
| <i>hCYP7A1</i> | CCCTCAACATCCGGACAGCTAAGGA  | GAATCGCTGAGGCTTTCCAGTG    | ACCGTCCTCAAGGTGCAAAGTG    |
| <i>mCyp7a1</i> | CAAGAACCTGTACATGAGGGACCAGG | GGCTGGCTGAGAGCTTGA        | GGTGGAGAGTGTATCGTTGAGAA   |
| <i>hGAPDH</i>  | TCAACAGCGACCCCACTCCTC      | CCAGGTGGTCTCCTCTGACT      | GCTTGACAAAGTGGTCGTTGA     |
| <i>mGapdh</i>  | ATCCACTGGTGTGCCAAGGCTG     | TGCCCAGAACATCATCCCT       | GGAAGGCCATGCCAGTGAG       |

**Table S1: Primer and probe sequences used for RT-PCR.**
